# Supplementary material
Source: publisher figshare collection journal article supplement (https://acs.figshare.com/ndownloader/files/5191030)
Supplement: Supplementary file 1 [file 5191030]

## Supplementary material

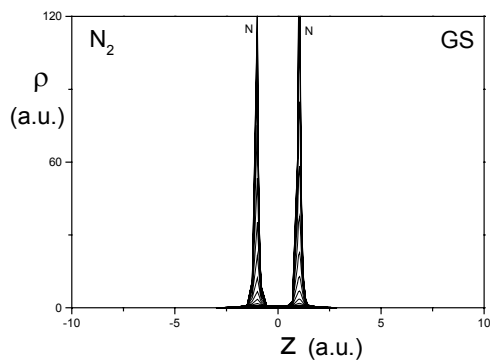

Figure 1a. The plot of the density of the  $N_2$  molecule in its ground state

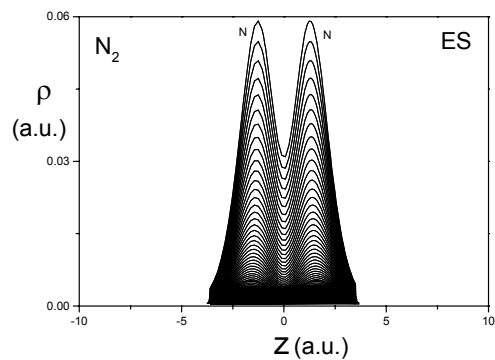

Figure 1a. The plot of the density of the  $N_2$  molecule in its first excited state

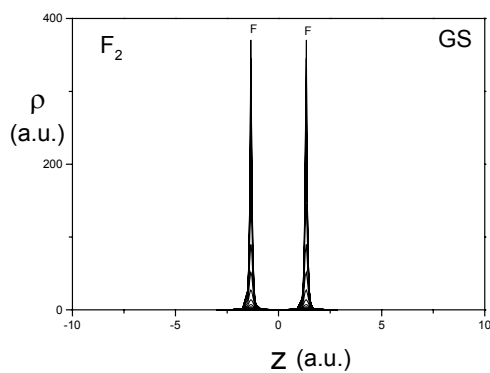

Figure 1b. The plot of the density of the  $F_2$  molecule in its ground state

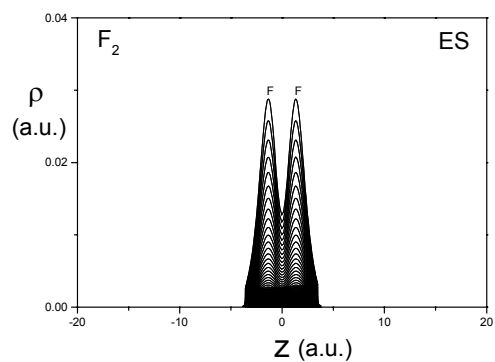

Figure 1b. The plot of the density of the  $F_2$  molecule in its first excited state

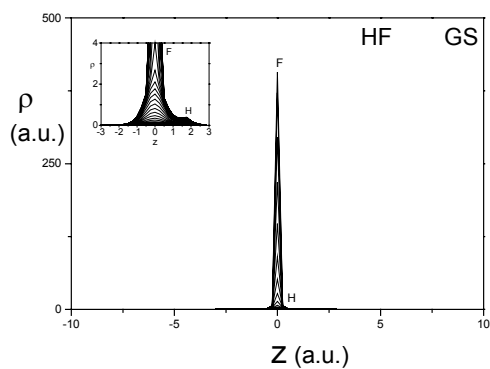

Figure 2a. The density profile of HF in its ground state

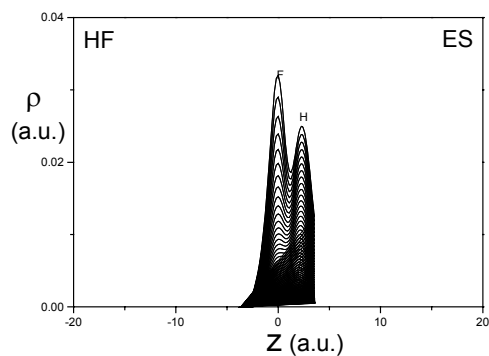

Figure 2a. The density profile of HF in its first excited state

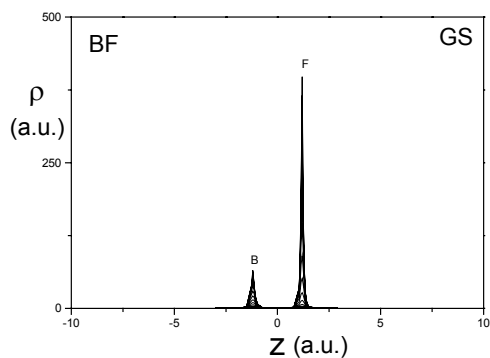

Figure 2b. The density profile of BF in its ground state

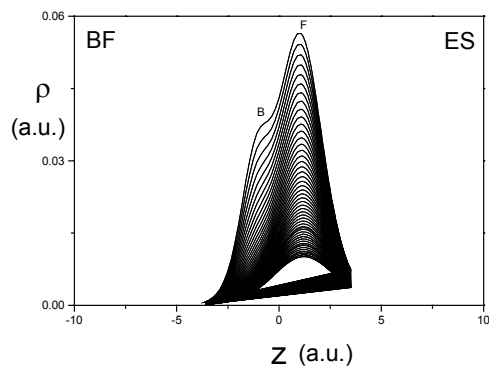

Figure 2b. The density profile of BF in its first excited state

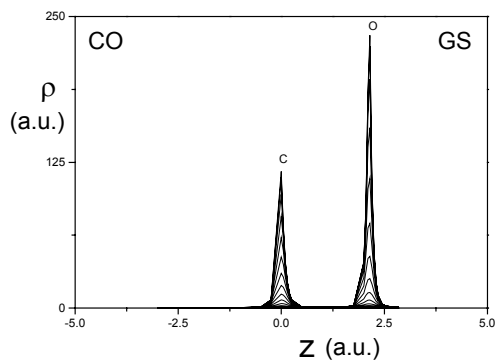

Figure 2c. The density profile of CO in its ground state

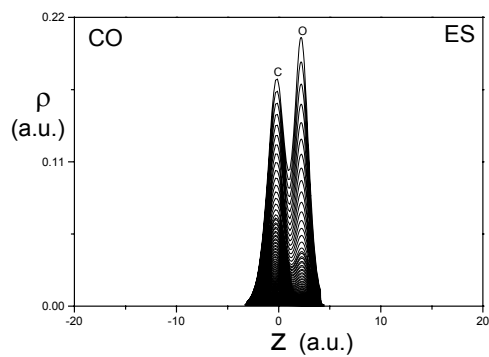

Figure 2c. The density profile of CO in its first excited state
